# Supplementary material
Source: publisher figshare collection journal article supplement (https://acs.figshare.com/ndownloader/files/29101503)
Supplement: Supplementary file 1 [file 29101503]

## Sheet: Table S1
Table S1: Elemental concentrations of the studies petrous bone samples. Green background represents samples with Ba/Ca (M/M) ≤5E-5
Sample name	Period according to archaeological context	Date*	BP age	[Ca] %	Li	Na	Mg	Al	K	V	Cr	Mn	Fe	Co	Ni	Cu	Zn	As	Se	Rb	Sr	Mo	Ag	Cd	Sn	Ba	Pb
					ppm
Rmpr-11 (grotta continenza)	Upper Paleolithic/Neolithic	10100 - 9816 calBCE	-11958	32.4667	0.234211	3017.51	680.747	125.955	79.8055		1.6878	11.659	311.944	0.0837916	0.49078	10.2465	154.895	0.778065		0.143643	93.3678	1.08929	0.0119702	0.311226		21.3669	0.227434
Rmpr-7 (grotta continenza)	Upper Paleolithic/Neolithic	8821 - 8642 calBCE	-10731.5	25.1781	0.174199	1717.15	596.688	150.404	36.6008		0.685541	4.88782	255.965	0.0534188	0.391738	1.83405	89.6546	0.534188		0.0890313	85.844	0.275997	0.489672			23.8248	0.14245
Rmpr-15 (grotta continenza)	Castelnovian Mesolithic	7284 - 7065 calBCE	-9174.5	30.0727	0.286905	3377.12	873.191	266.136	61.0437		1.28771	4.72161	301.692	0.137969	0.659186	2.92801	89.1587	0.827815		0.245278	102.695	0.383247		0.0613196		41.0841	0.168629
Rmpr-2 (grotta continenza)	Early Neolithic	6066 - 6002 calBCE	-8034	29.5891	0.397586	3400.53	956.115	58.2185	235.345		3.88942	16.033	261.644	0.0554499	0.174271	0.903042	60.385	1.59221		0.118821	107.494	2.40811	1.21198	0.205957		54.9747	0.301014
Rmpr-3 (grotta continenza)	Upper Paleolithic/Neolithic	5836 - 5723 calBCE	-7779.5	28.1175	0.427159	3580.43	1396.11	303.19	164.323		2.40233	11.0271	406.624	0.0886106	0.196912	0.994408	102.788	0.502127		0.590737	94.3604	0.935334	0.0590737	0.187067		50.6163	0.246141
Rmpr-8 (grotta continenza)	Upper Paleolithic/Neolithic	5832 - 5715 calBCE	-7773.5	31.7865	0.309443	2379.72	1238.89	337.532	170.535		0.588422	9.37195	397.345	0.139081	0.695407	3.65891	142.184	0.59912		0.684709	94.447	0.716804	0.962872	0.0962872		29.5174	0.106986
Rmpr-10 (grotta continenza)	Upper Paleolithic/Neolithic	5717 - 5641 calBCE	-7679	34.9401	0.360575	1978.77	1054.04	234.915	44.6412		1.25643	8.00787	350.136	0.105964	0.544959	1.96791	90.7962	1.25643		0.105964	145.247	2.51287	0.151378	0.635786		90.2967	0.393582
Rmpr-9 (grotta continenza)	Early Neolithic	5607 - 5485 calBCE	-7546	27.4696	0.187247	3121.22	1011.68	112.009	91.9231		2.28363	4.64981	252.575	0.0275136	0.0962978	3.05401	58.549	0.935464		0.0550273	111.802	0.357677	0.0412705	0.165082		78.4827	0.137568
Rmpr-18 (ripa bianca)	Neolithic	5465 - 5232 calBCE	-7348.5	27.3646	2.54045	1909.54	1068.63	1681.78	338.534		17.4158	159.227	1899.91	0.83668	10.0273	6.91226	222.943	1.71198		3.46257	283.313	13.6958	0.025744	0.810936		227.191	0.9654
Rmpr-19 (ripa bianca)	Neolithic	5345 - 5221 calBCE	-7283	34.9375	1.21402	2852.21	791.458	406.047	101.51		9.52083	930.938	3062.5	0.4375	13.8125	7.78125	146.875	3.75		0.385417	326.458	3.96875	0.0208333	1		366.667	0.541667
Rmpr-17 (ripa bianca)	Neolithic	5324 - 5223 calBCE	-7273.5	33.6492	2.16613	2223.53	1015.62	852.041	175.781		28.8628	412.037	1134.84	0.737847	13.1221	9.08565	413.773	2.011		1.15741	445.891	15.3356	0.130208	1.69271		412.182	3.0816
Rmpr-16 (ripa bianca)	Neolithic	5301 - 5214 calBCE	-7257.5	33.2351	2.42506	2467.08	1101.22	1459.74	282.627		14.2436	220.537	1524.91	0.810294	8.70822	7.9565	291.608	1.67916		2.49922	337.59	29.4049	0.0195251	1.18127		251.191	2.60661
Rmpr-6 (grotta continenza)	Upper Paleolithic/Neolithic	5242 - 5177 calBCE	-7209.5	28.7944	0.552639	1576.03	598.149	400.361	115.536		2.10823	66.0048	484.893	0.3432	1.69149	13.5196	161.059	1.92437		0.747686	98.854	1.00509	0.110314	0.99283		35.7664	0.208372
Rmpr-24 (su crucefissu)	Copper (Chalcolithic) and Bronze Age	3626 - 3374 calBCE	-5500	30.2599	0.658202	2941.04	1347.03	313.774	118.151		3.88128	37.1766	510.147	0.710299	2.10553	0.621512	44.3176	1.48402		0.418569	143.962	1.04008	0.0380518	0.304414		23.9853	0.202943
RMPR-1014 (monte san biagio)	Eneolithic	3500 - 2500 BCE	-5000	29.8335	0.298491	2435.35	2169.65	818.122	97.3653	4.96983	6.52155	59.2759	276.48	0.273707	1.6778	7.93103	87.4364	4.66595	1.30711	0.742457	142.315	0.164871	0.332974	1.22575	0.0646552	43.8836	1.88901
Rmpr-4 (grotta continenza)	Upper Paleolithic/Neolithic	2950 - 2880 calBCE	-4915	32.0116	0.537058	2250.76	747.499	494.63	152.001		2.02749	74.1429	649.524	0.242813	0.934829	12.2499	194.007	1.44474		1.06838	102.151	1.12908	0.0364219	0.934829		62.1115	0.582751
Rmpr-5 (grotta continenza)	Upper Paleolithic/Neolithic	2902 - 2877 calBCE	-4889.5	31.0038	0.550564	1620.92	1185.49	497.828	149.47		3.53386	42.1289	468.031	0.277367	1.57175	18.0699	136.012	2.14702		1.22247	130.671	2.1573	10.4064	0.585552		132.212	0.749918
Rmpr-25 (su crucefissu)	Copper (Chalcolithic) and Bronze Age	3500 - 900 BCE	-4200	31.6192	0.505389	2802.19	797.943	502.415	132.889		5.55046	33.1161	506.162	0.322504	3.24201	2.10476	54.2825	1.54462		0.69593	155.396	1.00146	0.0169739	1.32396		66.4358	0.271582
RMPR-26 (su crucefissu)	Copper (Chalcolithic) and Bronze Age	3500 - 900 BCE	-4200	26.5048	1.48594	3299.87	1629.18	765.06	175.569		4.63855	97.3896	817.938	0.923695	5.35475	5.75636	69.7456	4.78581		1.0174	210.977	2.49665	0.174029	0.615797		63.6412	2.12851
RMPR-27 (su crucefissu)	Copper (Chalcolithic) and Bronze Age	3500 - 900 BCE	-4200	29.5996	2.37963	16814.8	5990.74	743.889	327.315		17.1574	180.741	608.981	3.00926	7.57407	4.52778	153.056	7.87963		1.28704	900.185	3.12037	0.138889	2.74074		229.444	3.09259
RMPR-28 (su crucefissu)	Copper (Chalcolithic) and Bronze Age	3500 - 900 BCE	-4200	29.2256	1.01976	3579.77	1135.54	869.768	173.678		8.27491	94.0195	668.154	1.54026	3.80285	3.66475	67.3996	1.71022		1.09412	258.976	1.15785	0.0318674	1.54026		112.28	1.2747
RMPR-29 (su crucefissu)	Copper (Chalcolithic) and Bronze Age	3500 - 900 BCE	-4200	26.3738	0.545703	4158.71	817.796	357.663	105.654		2.16007	60.6185	291.345	0.75792	3.18327	2.93315	82.0828	1.75838		0.515386	115.128	1.03835	0.0985296	1.09141		49.0829	1.51079
Rmpr-22 (su crucefissu)	Copper (Chalcolithic) and Bronze Age	2010 - 1881 calBCE	-3945.5	33.2828	0.291639	3135.63	997.612	241.052	62.6186		10.4239	50.0842	512.091	0.621365	4.221	2.75329	52.5803	1.51056		0.128558	218.871	1.47842	0.0964187	2.20692		88.7802	0.321396
Rmpr-1 (martinsicuro)	Late Bronze Age/Early Iron Age	930 - 839 calBCE	-2884.5	32.0591	0.911183	3713.06	1561.4	114.501	179.224		22.0314	50.7941	295.383	0.10157	1.41274	4.84765	87.6916	3.28717		0.193906	425.669	2.81625	1.39428	0.323176		265.928	0.33241
RMPR-1016 (castel di decima)	Iron Age A	900 - 700 BCE	-2800	27.351	0.651671	3229.22	1466.51	790.902	80.2371	11.0167	2.71658	163.776	1484.67	1.11504	6.32969	7.71015	71.0848	0.572622	1.2847	1.02249	498.774	0.06491	0.0469152	0.199229	0.0565553	876.956	1.14781
RMPR-473 (civitavecchia)	Iron Age/Roman Republic	700 - 600 BCE	-2650	30.4778	0.968193	3927.24	914.536	1296.47	162.361	24.8664	9.82316	149.322	9170.68	1.12214	2.27226	1.79389	65.6768	6.60814	7.09033	1.01654	232.491	0.20229	0.0610687	0.274173	0.517812	63.5445	13.8736
RMPR-474 (civitavecchia)	Iron Age/Roman Republic	700 - 600 BCE	-2650	24.7096	0.33564	2861.93	720.815	166.444	49.3988	3.69637	12.4567	1068.56	756.364	3.73702	5.56834	1.77855	57.622	1.46194	2.94723	0.118512	245.087	0.491349	0.0519031	0.249567	7.05882	102.667	2.65369
RMPR-475 (civitavecchia)	Iron Age/Roman Republic	700 - 600 BCE	-2650	23.4782	0.326435	2754.26	575.944	436.356	92.4232	2.66155	3.58077	20.277	213.988	0.285047	1.80975	6.8004	50.3558	0.402537	1.58745	0.53004	314.224	0.0914553	0.209613	0.099466	0.0233645	73.7837	6.25679
RMPR-850 (ardea)	Iron Age	800 - 500 BCE	-2650	29.115	0.653409	2175.74	927.695	1056.99	153.115	107.79	2.05043	18.6996	432.925	0.181108	0.825994	17.2053	73.2592	3.67614	0.664062	1.19105	386.994	0.268466	0.0667614	0.341974	0.084517	22.0611	47.0753
RMPR-851 (ardea)	Iron Age	800 - 500 BCE	-2650	30.0754	4.06575	1973.74	970.629	5980.43	399.026	47.563	5.02329	61.263	2542.98	1.59452	3.13151	6.88767	62.0411	7.48082	1.77808	12.826	634.334	0.0767123	0.10137	0.264384	0.130137	132.151	9.75205
RMPR-1021 (boville ernica)	Iron Age B	700 - 600 BCE	-2650	31.926	0.96519	2658.37	588.907	1439.15	95.5111	7.14161	6.28481	16.6171	542.717	0.215981	1.17247	3.72627	98.7935	0.879747	0.439082	1.05617	86.3038	0.154272	0.274525	2.02057	0.0561709	53.4003	1.96624
RMPR-435 (palestrina colombella)	Iron Age/Roman Republic	600 - 200 BCE	-2400	24.5433	0.366405	1455.68	443.85	954.643	80.6336	24.4499	2.07171	73.4705	894.92	0.247544	0.456778	14.3124	97.1002	1.0442	0.623772	0.966601	379.573	0.378193	0.126719	0.0977407	0.109037	59.7544	19.313
RMPR-437 (palestrina selciata)	Iron Age/Roman Republic	400 - 200 BCE	-2300	25.338	0.410019	2695.67	596.417	351.223	56.9981	50.6818	4.62801	24.1735	103.577	0.146568	0.536178	13.2783	79.962	2.94898	0.320037	0.296846	252.054	0.147495	0.0630798	0.0672542	0.0324675	14.0417	29.5164
RMPR-835 (civitanova marche)	Imperial	27 BCE - 300 CE	-2163.5	27.3617	1.72421	3488.51	854.471	839.142	207.039	11.1726	15.8323	172.583	1117.77	0.766865	4.14286	35.755	155.84	2.03968	0.960317	1.28075	171.054	0.534722	1.71825	0.326885	0.168651	108.691	77.0304
RMPR-836 (civitanova marche)	Imperial	27 BCE - 300 CE	-2163.5	30.2777	2.08525	3303.87	950.944	771.358	162.661	16.7247	26.7569	131.311	774.75	0.718894	4.16244	39.4781	229.508	1.78226	0.730415	1.01267	304.97	1.25806	1.5023	1.12385	0.129032	146.097	60.0104
RMPR-1547 (monterotondo)	Imperial	27 BCE - 300 CE	-2163.5	19.6676	1.45579	2111.98	519.766	2519.84	150.432	12.2877	6.37484	51.5423	1131.1	0.585928	1.58593	7.84807	59.4851	2.21233	4.52989	3.50872	176.793	0.167497	0.0591532	0.14259	0.0498132	286.159	35.7615
RMPR-1548 (monterotondo)	Imperial	27 BCE - 300 CE	-2163.5	34.597	1.46832	2726.74	680.698	2211.65	147.832	23.4199	3.21988	106.998	868.257	0.224224	1.38944	4.06335	81.4988	2.93168	1.7087	2.66894	474.044	0.301242	0.0484472	0.483851	0.0571429	1072.81	45.0122
RMPR-1549 (monterotondo)	Imperial	27 BCE - 300 CE	-2163.5	19.5692	1.41276	2152.62	518.718	2600.85	162.267	23.821	7.4987	26.0013	1102.15	0.292969	1.2526	6.86654	53.8568	2.15104	2.54883	3.58464	204.879	0.240885	0.129557	0.297201	0.0514323	315.258	50.9753
RMPR-1550 (monterotondo)	Imperial	27 BCE - 300 CE	-2163.5	26.7285	9.45022	2298.6	1183.45	23391.4	916.985	57.1126	15.2684	184.045	10151.2	2.81385	9.15584	20.9848	106.424	14.3463	30.2229	32.3636	163.374	0.218615	0.183983	0.47619	1.28355	246.333	916.832
RMPR-42 (isola sacra)	Imperial Rome	22 - 120 calCE	-1929	33.4112	0.859889	3238.07	1259.48	293.795	59.2396		6.14568	467.628	620.637	2.98432	3.65874	31.6388	137.498	8.27854		0.28663	566.768	0.758725	0.059012	0.328781		28.0644	154.977
RMPR-80 (viale rossini)	Imperial Rome	23 - 130 calCE	-1923.5	31.5538	0.59164	2263.95	532.051	258.182	69.8071	19.9043	5.67444	7.23151	124.445	0.0940514	0.650322	8.87862	66.1262	1.73875	0.73955	0.536977	533.322	0.716238	0.114952	0.0635048	0.358521	95.6656	42.6889
RMPR-39 (isola sacra)	Imperial Rome	68 - 130 calCE	-1901	29.9534	1.217	3858.64	1254.81	234.805	69.6507		3.36909	801.018	1177.12	5.24615	6.65567	150.646	137.514	7.90017		0.137514	670.998	1.43702	0.192519	0.35066		58.1889	45.3979
RMPR-75 (viale rossini)	Imperial Rome	0 - 200 CE	-1900	27.0453	0.293893	2381.89	563.055	144.791	45.5153	5.69847	2.16031	35.2252	45.9758	0.185751	0.416031	25.0573	91.1934	0.71883	0.489822	0.142494	330.576	0.20229	0.0572519	0.0521628	0.0178117	100.081	171.863
RMPR-76 (viale rossini)	Imperial Rome	0 - 200 CE	-1900	27.925	0.24463	2285.97	549.928	211.304	41.8902	6.74702	4.83771	9.92124	129.523	0.126492	0.689737	7.47733	101.422	0.909308	0.682578	0.115752	329.18	0.162291	0.101432	0.0417661	0.0167064	87.2494	83.1094
RMPR-78 (viale rossini)	Imperial Rome	0 - 200 CE	-1900	24.3247	0.526	3001.01	670.582	195.962	46.068	12.114	0.675333	3.57533	69.2173	0.0526667	2.68467	5.20867	59.254	1.846	0.317333	0.176	237.787	0.129333	0.107333	0.103	0.034	42.474	23.816
RMPR-111 (via paisiello)	Imperial Rome	0 - 200 CE	-1900	30.6225	0.808411	2665.76	706.64	576.534	95.2138	32.5607	1.28154	29.9568	356.943	0.19743	0.629673	12.8271	122.842	6.9965	1.21028	0.984813	296.886	0.579439	0.212617	0.120911	0.0537383	40.5713	61.6012
RMPR-113 (via paisiello)	Imperial Rome	0 - 200 CE	-1900	20.6254	0.534325	1511.95	558.678	496.069	71.4966	27.4783	3.95995	9.59382	249.13	0.161327	0.562929	15.7311	83.7483	4.51831	0.276888	0.703661	323.873	0.371854	0.331808	0.0720824	0.264302	56.7243	53.3883
RMPR-114 (via paisiello)	Imperial Rome	0 - 200 CE	-1900	21.3318	0.335374	2306.17	703.45	198.975	34.3218	9.97687	1.67483	4.01156	58.0129	0.0428571	0.290476	1.06667	67.4653	2.31156	0.242857	0.0938776	394.307	0.829252	0.201361	0.0153061	0.0557823	45.683	74.8687
RMPR-115 (via paisiello)	Imperial Rome	0 - 200 CE	-1900	31.3621	1.02184	3572.7	833.471	1130.81	123.604	31.2791	3.00243	69.4272	879.481	0.628641	0.956311	15.8301	146.626	7.97816	1.37136	1.80097	424.308	2.56796	0.776699	0.366505	0.208738	80.9879	288.467
RMPR-116 (via paisiello)	Imperial Rome	0 - 200 CE	-1900	31.5467	1.09909	3111.63	1108.02	340.781	53.5501	26.306	2.34586	20.7946	220.518	0.269172	0.70691	16.4412	99.4233	9.74677	3.81815	0.279423	275.28	0.279043	0.134776	0.172361	0.0770691	49.4146	30.6506
RMPR-131 (via paisiello)	Imperial Rome	0 - 200 CE	-1900	30.5556	1.08373	3145.35	997.753	220.011	51.6523	75.5064	5.38596	14.0742	109.394	0.196172	0.5	17.2177	71.8174	19.0734	3.65391	0.210526	490	0.463317	0.15949	0.0793461	0.0653907	65.6675	45.7637
RMPR-436 (palestrina antina)	Imperial Rome	0 - 200 CE	-1900	27.1035	0.29595	2677.48	716.119	164.144	49.9907	64.9782	22.5234	236.044	45.236	0.159657	0.48676	11.6877	105.773	3.12539	0.402648	0.103583	477.382	0.403427	0.0895639	0.626558	0.0116822	25.5958	31.5265
RMPR-801 (viale rossini)	Imperial Rome	0 - 200 CE	-1900	25.7188	0.514407	2596.87	569.061	150.045	52.1695	27.6907	7.75508	13.028	133.598	0.131356	0.862712	7.55847	69.9085	1.73814	1.07288	0.216949	277.662	0.295763	0.109322	0.0597458	0.020339	64.7271	45.0927
RMPR-1551 (monterotondo)	Imperial	55 - 211 calCE	-1867	23.6562	3.15487	2139.87	682.604	5802.39	310.015	30.2697	14.1509	137.046	2418.23	0.919893	2.34379	13.464	92.0581	5.12884	13.4246	8.39052	327.994	0.220294	0.070761	0.53004	0.155541	243.232	60.7773
RMPR-123 (casale del dolce)	Imperial Rome/Late Antiquity	77- 213 calCE	-1855	23.9511	0.566535	2215.59	530.817	628.942	59.9328	2.2365	1.16469	11.9473	412.913	0.303689	1.94335	4.54875	67.9144	0.695652	0.424901	0.788538	91.6252	0.0527009	0.156785	0.128458	0.374835	85.2299	550.539
RMPR-50 (centocelle)	Imperial Rome	135 - 244 calCE	-1810.5	28.052	0.0679677	1686.96	677.573	124.378	61.1225	74.4509	3.87416	10.1689	48.8668	0.18035	0.304845	19.1992	73.9408	3.04307	0.259758	0.168237	1031.94	1.29946	0.0195155	0.186406	0.00942127	418.662	8.6153
RMPR-49 (centocelle)	Imperial Rome	0 - 400 CE	-1800	21.6288	2.72402	1311.44	822.126	4542.73	396.93	38.7247	4.01957	69.6903	2250.79	1.06883	1.50742	19.4899	62.2827	4.11943	0.95749	15.274	756.186	0.361673	0.165317	0.120445	0.163293	282.762	22.8961
RMPR-51 (centocelle)	Imperial Rome	0 - 400 CE	-1800	32.5766	1.03922	1918.21	548.013	1492.41	124.992	33.1275	4.2915	21.7144	760.782	0.588889	0.612418	14.666	72.5634	4.96209	1.49216	3.50784	508.873	0.414379	0.269281	0.129085	0.164706	106.927	60.6017
RMPR-66 (anas)	Imperial Rome	100-300 CE	-1800	28.3755	1.06209	1555.91	561.931	1388.39	255.303	62.534	13.5007	140.692	803.016	0.555556	2.95621	37.6915	82.834	2.55163	1.01242	2.18235	604.169	1.26078	0.28366	0.264706	0.243137	45.7098	62.5076
RMPR-67 (anas)	Imperial Rome	100-300 CE	-1800	31.8234	0.328889	2532.58	773.331	68.71	34.9667	47.5011	15.9778	498.937	166.417	0.584444	2.93667	18.7678	74.8678	0.742222	0.734444	0.17	770.306	0.256667	0.0755556	0.159444	0.00333333	54.2922	15.293
RMPR-68 (anas)	Imperial Rome	100-300 CE	-1800	35.9944	0.572917	2873.93	729.467	543.867	93.322	28.5975	2.45549	31.5634	250.652	0.267992	1.58049	33.0057	99.0616	1.52841	0.788826	0.52178	311.398	0.192235	0.0625	0.274148	0.0369318	18.215	64.8927
RMPR-69 (anas)	Imperial Rome	100-300 CE	-1800	32.0708	0.407459	2822.24	884.855	348.948	78.3964	40.4337	4.10083	6.18646	110.54	0.089779	0.790055	29.7044	74.4876	3.81492	0.616022	0.301105	311.401	0.33011	0.0870166	0.0814917	0.0151934	18.5331	30.6045
RMPR-70 (anas)	Imperial Rome	100-300 CE	-1800	32.3494	0.405498	2740.65	919.587	160.412	48.0679	46.079	11.5034	5.20876	66.7302	0.0927835	0.862543	46.1503	82.9845	3.18729	0.491409	0.0910653	603.933	0.242268	0.0352234	0.218643	0.128007	32.4785	25.356
RMPR-71 (anas)	Imperial Rome	100-300 CE	-1800	33.6848	0.483135	2761.29	862.215	92.003	51.7044	45.7599	20.4345	562.718	709.395	1.09722	5.27778	12.9643	107.108	1.09226	0.930556	0.147817	619.129	0.363095	0.0823413	0.361607	0.00992063	63.5685	43.0856
RMPR-72 (anas)	Imperial Rome	100-300 CE	-1800	27.8577	0.34542	2825.81	714.634	129.025	54.7261	30.8702	23.4198	12.1355	62.4838	0.0763359	3.58397	9.9666	115.885	0.800573	0.604008	0.193702	396.782	0.195611	0.318702	0.146469	0.0353053	24.4742	32.4246
RMPR-73 (anas)	Imperial Rome	100-300 CE	-1800	24.8673	0.515262	2002.22	505.811	546.95	105.155	62.399	3.6548	734.349	532.94	4.21366	5.75945	23.0262	57.2892	5.98837	3.97674	0.944041	257.276	0.414244	0.163517	0.179142	0.0559593	23.5734	5378.7
RMPR-125 (casale del dolce)	Imperial Rome/Late Antiquity	0 - 400 CE	-1800	32.366	1.09333	2712.09	815.4	1680.15	151.42	7.04889	3.19111	38.3667	1553.86	0.568889	1.93556	10.9267	174.173	1.53111	1.3	2.52222	118.909	0.0755556	0.264444	0.511111	0.151111	99.2267	45.6526
RMPR-128 (casale del dolce)	Imperial Rome/Late Antiquity	0 - 400 CE	-1800	34.4268	1.23735	2745.07	795.305	53.5803	41.018	17.3254	1.65078	1.85311	29.8424	0.0797665	0.59679	2.47519	74.9475	0.863813	0.332198	0.0559339	171.312	0.0904669	0.0141051	0.045963	0.00194553	69.643	9.93385
RMPR-37 (isola sacra)	Imperial Rome	1 - 400 CE	-1799.5	32.1683	0.85148	3809.32	1317.84	109.953	109.52		9.36628	73.9671	334.171	0.711893	4.34115	26.4377	77.4149	4.73199		0.125628	279.453	0.907314	0.0558347	0.041876		32.0073	20.831
RMPR-38 (isola sacra)	Imperial Rome	1 - 400 CE	-1799.5	35.9482	0.968816	4427.79	1219.35	826.521	149.485		16.0384	1132.3	2938.24	9.79413	13.0639	27.5507	127.006	19.5126		0.711474	927.944	3.28489	0.0832576	0.310324		199.213	127.006
RMPR-40 (isola sacra)	Imperial Rome	1 - 400 CE	-1799.5	29.9066	0.719509	4230.95	1243.22	760.675	161.831		3.19651	971.456	2106.63	9.76645	15.4636	54.034	139.302	8.77565		1.46261	747.7	1.36825	0.224109	0.176929		62.3142	134.82
RMPR-41 (isola sacra)	Imperial Rome	1 - 400 CE	-1799.5	30.1315	0.411523	5347.74	1561.73	121.811	92.0885		42.572	200.309	864.403	1.06996	3.86831	34.0432	101.615	4.7428		0.164609	603.909	0.565844	0.0411523	0.37037		42.7366	147.805
RMPR-43 (isola sacra)	Imperial Rome	1 - 400 CE	-1799.5	34.4742	1.59933	3819.02	952.862	477.609	74.7559		1.95286	829.798	3585.86	1.42256	2.09596	35.5387	129.377	13.2912		0.538721	647.391	2.11279	0.0757576	0.513468		21.2205	124.214
RMPR-44 (isola sacra)	Imperial Rome	1 - 400 CE	-1799.5	29.1523	2.11859	3186.41	1379.38	1358.39	227.666		18.4639	270.694	1414.14	1.25935	3.99449	25.5018	105.601	6.90673		3.37794	376.82	0.714942	0.118064	0.170537		38.7315	76.4572
RMPR-45 (isola sacra)	Imperial Rome	1 - 400 CE	-1799.5	23.5241	0.497875	1540.38	551.969	135.36	28.6501	6.67989	0.949008	935.934	814.67	1.08003	4.44688	22.3208	69.8697	1.64235	0.429178	0.0715297	200.659	0.234419	0.167847	0.139164	0.240085	71.3173	43.1161
RMPR-1543 (mazzano romano monte agnone)	Imperial	1 - 400 CE	-1799.5	36.9971	1.22308	3404.97	1249.87	1698.27	143.377	39.6723	7.49231	86.4446	630.109	0.321538	2.62308	9.69385	152.555	11.9538	1.33385	1.90154	457.623	6.43538	0.230769	0.236154	0.206154	59.4723	111.85
RMPR-1544 (mazzano romano monte agnone)	Imperial	1 - 400 CE	-1799.5	29.1758	2.8	2597.27	1342.84	1721.99	215.896	29.1341	3.35882	108.46	735.632	0.305882	1.70118	20.1576	253.025	22.3365	1.34824	4.18353	1209.42	1.66	0.529412	0.0905882	0.156471	124.748	15.5373
RMPR-1545 (mazzano romano monte agnone)	Imperial	1 - 400 CE	-1799.5	25.6254	0.526475	2495.69	944.343	554.736	76.1581	20.3336	0.462935	16.9539	206.188	0.0763994	0.494705	3.69667	100.717	2.23374	0.571104	1.04992	384.559	8.20121	0.385023	0.0790469	0.0567322	36.5008	76.1614
RMPR-132 (marcellino & pietro)	Late Antiquity	136 - 326 calCE	-1769	27.3193	0.364019	3053.98	1021.96	124.339	49.2852	27.3712	2.3586	36.8797	55.6342	0.139591	0.259928	4.18773	63.151	12.9952	2.91697	0.0974729	479.006	0.128761	0.0848375	0.038207	0.00481348	99.4446	42.2347
RMPR-47 (centocelle)	Imperial Rome	232 - 333 calCE	-1717.5	25.7449	0.0464135	1445.08	703.178	117.489	56.0791	88.1245	2.75844	27.4124	57.1688	0.185654	0.293249	21.9251	74.0316	3.70781	0.439873	0.127637	1187.19	1.19831	0.0727848	0.237869	0.00949367	1873.64	8.08615
RMPR-126 (casale del dolce)	Imperial Rome/Late Antiquity	240 - 334 calCE	-1713	31.4806	0.393305	3601.15	626.785	145.96	54.0774	12.1841	3.38633	17.0084	149.368	0.285914	1.45886	2.46304	65.493	1.93654	0.423291	0.204324	199.551	0.0634589	0.105997	0.37622	0.0509066	61.9414	15.5074
RMPR-31 (mausoleo di augusto)	Late Antiquity/Early Medieval	332 - 419 calCE	-1624.5	27.2249	1.59947	3037.1	1005.11	1381.79	262.067		7.04145	55.9436	924.569	0.435359	2.42287	98.5236	136.854	9.80504		3.41662	597.009	2.57429	0.208215	0.340716		73.7176	169.348
RMPR-133 (marcellino & pietro)	Late Antiquity	300 - 500 CE	-1600	28.8925	0.734281	3658.77	736.972	590.761	56.2448	26.9484	15.4948	64.4543	337.48	0.603293	4.16168	13.854	112.634	7.72979	12.7725	0.295659	481.687	2.52246	0.104042	0.16991	0.115269	610.469	196.26
RMPR-134 (marcellino & pietro)	Late Antiquity	300 - 500 CE	-1600	24.1384	0.156329	3338.71	1054.13	53.9253	42.1234	19.7639	0.251899	1.45	29.7177	0.00759494	0.0936709	6.65886	40.7924	5.51709	0.66962	0.0613924	586.959	0.556962	0.0670886	0.0164557	0.0189873	442.084	21.7236
RMPR-136 (marcellino & pietro)	Late Antiquity	300 - 500 CE	-1600	24.0142	0.131382	2982.1	1123.43	82.7167	43.4184	15.3599	0.250934	4.34682	40.6034	0.0280199	0.0641345	5.0797	64.3543	5.93026	1.02677	0.0722291	445.718	0.0915318	0.0535492	0.0136986	0.0628892	278.732	54.8865
RMPR-137 (marcellino & pietro)	Late Antiquity	300 - 500 CE	-1600	23.4336	0.278875	1759.62	617.407	94.1322	34.3837	11.0258	0.725684	1.18085	41.7044	0.0182371	0.170213	2.13754	83.7059	3.47416	0.234043	0.075228	347.243	0.455167	0.0478723	0.00683891	0.0182371	64.9856	14.3734
RMPR-30 (mausouh di augusto)	Late Antiquity/Early Medieval	300 - 700 CE	-1500	28.7982	1.05684	2312.91	924.736	485.433	104.542		4.02028	292.059	482.933	0.628392	4.64867	61.5824	118.966	13.3462		0.856898	683.448	1.77092	0.078549	0.249929		82.3336	49.3645
RMPR-32 (mausoleo di augusto)	Late Antiquity/Early Medieval	300 - 700 CE	-1500	32.9676	2.92296	2510.65	1201.9	2069.3	395.858		11.1692	77.2358	1644.6	0.948509	4.18118	136.914	185.114	12.0015		5.9427	783.779	3.00039	0.425861	0.483933		92.9346	564.073
RMPR-34 (mausoleo di augusto)	Late Antiquity/Early Medieval	300 - 700 CE	-1500	32.3669	1.11769	2252.9	1330.27	904.778	179.378		9.30309	251.698	568.814	1.01907	2.81613	204.471	201.512	16.1955		1.49025	983.235	3.4188	0.120535	0.657462		162.284	260.026
RMPR-33 (mausoleo di augusto)	Late Antiquity/Early Medieval	300 - 700 CE	-1500	32.9792	1.51165	2385.9	1127.48	1009.05	230.117		6.17177	195.07	827.267	0.654728	4.46755	127.383	115.251	8.78105		2.10861	758.714	2.47448	0.11554	0.336992		115.925	93.4206
RMPR-35 (celio)	Late Antiquity	400 - 600 CE	-1500	25.5949	0.840456	3247.86	1797.01	260.826	247.009		3.24074	8.23362	155.84	0.14245	0.826211	11.8234	79.7009	6.55271		0.619658	631.695	1.90883	0.0213675	0.02849		33.4402	30.4772
RMPR-36 (celio)	Late Antiquity	400 - 600 CE	-1500	26.1896	1.00368	4677.69	1589.62	179.389	155.711		3.12412	69.5434	74.7809	0.162567	1.32174	15.1965	113.373	29.5307		0.219112	727.311	1.32881	0.0141363	0.106022		45.9146	13.6651
RMPR-104 (crypta balbi)	Late Antiquity	400 - 600 CE	-1500	23.7293	1.30918	2524.98	859.95	1023.45	193.501	19.7186	3.67512	29.1063	630.443	0.359903	1.80676	45.6244	107.575	70.9034	0.445652	1.89614	400.871	0.724638	0.0748792	0.0905797	0.0869565	79.9179	32.9231
RMPR-105 (crypta balbi)	Late Antiquity	400 - 600 CE	-1500	28.8385	0.565369	3257.63	1199.21	110.17	95.8248	33.4117	4.09179	4.39569	41.8707	0.0688456	0.568846	136.876	84.9103	151.527	0.401947	0.215577	763.122	1.60153	1.38317	0.112656	0.0368567	200.772	18.5371
RMPR-106 (crypta balbi)	Late Antiquity	400 - 600 CE	-1500	24.7132	1.12521	2861.03	908.744	300.687	120.566	16.115	2.00511	7.36457	171.892	0.287053	3.56644	51.029	96.3612	108.977	0.219761	0.468484	540.613	1.4029	0.0477002	0.123935	0.0689949	93.0707	41.594
RMPR-107 (crypta balbi)	Late Antiquity	400 - 600 CE	-1500	29.4761	0.853132	3336.03	1189.33	183.512	92.7916	34.5194	7.8013	14.919	94.649	0.163067	0.950324	37.3844	90.9784	249.612	0.741901	0.176026	715.542	0.9946	0.358531	0.105292	0.0691145	219.599	10.8859
RMPR-108 (crypta balbi)	Late Antiquity	400 - 600 CE	-1500	29.9153	1.87648	2335.45	993.11	141.404	74.3071	21.0279	3.13875	5.62183	40.1261	0.117597	0.792724	10.5135	77.2039	266.952	0.333333	0.0879865	568.94	3.30541	0.0905245	0.0279188	0.0152284	76.324	2.59532
RMPR-109 (crypta balbi)	Late Antiquity	400 - 600 CE	-1500	23.5937	1.11807	2355.41	602.205	591.708	132.778	16.6094	11.9818	12.9707	358.796	0.162441	1.08479	9.16244	73.7227	11.8035	0.868463	1.08003	427.091	1.54913	2.08162	0.0324881	0.158479	58.8994	31.2522
RMPR-110 (crypta balbi)	Late Antiquity	400 - 600 CE	-1500	22.3425	0.541121	2200.39	679.308	207.903	63.9794	7.33364	1.68505	7.61869	154.213	0.0485981	1.01682	9.59533	71.2579	3.34112	0.443925	0.197196	426.944	0.928972	0.109346	0.0518692	0.0214953	56.9794	10.1324
RMPR-117 (san ercolano)	Late Antiquity	400 - 600 CE	-1500	27.639	0.576741	3163.19	1731.64	113.065	62.7706	26.8726	5.20438	1.58307	34.0852	0.112869	0.86577	17.4214	59.8697	12.8842	1.66086	0.0841245	819.489	0.195939	0.0268987	0.0440401	0.00448312	101.938	11.6242
RMPR-118 (san ercolano)	Late Antiquity	400 - 600 CE	-1500	33.2241	0.420034	2430.77	744.927	847.065	64.6002	22.383	3.7601	17.7197	84.2988	0.453704	1.48822	31.9394	98.6439	3.2399	0.290404	0.122896	787.74	0.263468	0.566498	0.219276	0.0412458	74.5497	19.4826
RMPR-120 (san ercolano)	Late Antiquity	400 - 600 CE	-1500	27.4713	0.251756	2709.54	725.824	151.132	48.6751	22.3607	1.61827	6.64813	36.4362	0.213115	0.912763	14.6721	63.2395	3.61475	0.706089	0.126464	564.854	0.109485	0.0614754	0.057377	0.0128806	37.3683	13.614
RMPR-121 (san ercolano)	Late Antiquity	400 - 600 CE	-1500	30.3469	0.864085	3588.48	886.361	582.029	106.874	27.3746	1.97042	121.124	414.887	0.358451	1.00563	28.4113	85.0838	4.2331	0.359155	0.990141	463.901	0.188028	0.034507	0.109507	0.071831	35.169	21.6211
RMPR-122 (san ercolano)	Late Antiquity	400 - 600 CE	-1500	25.9082	0.519847	1967.39	695.272	284.238	77.3481	44.0702	2.91374	18.9122	98.9992	0.266412	0.812214	26.845	63.5015	2.41145	0.445038	0.243511	625.565	0.143511	0.0603053	0.0431298	0.0175573	40.0053	12.1458
RMPR-1283 (palazzo della cancelleria)	Medieval	771 - 947 calCE	-1141	36.2485	1.01779	3173.41	906.826	604.536	203.423	38.8319	3.53114	11.637	313.398	0.184164	1.02046	214.828	108.86	38.4786	0.977758	1.37722	879.86	3.33274	0.177936	0.184164	0.372776	143.138	129.096
RMPR-59 (villa magna)	Early Medieval	820 - 990 calCE	-1095	27.0272	1.04212	1538.73	694.642	1190.26	192.005	36.1522	1.55163	759.678	1095.41	1.56114	3.75951	34.3553	113.492	2.70924	0.745245	2.02853	445.076	1.64606	0.144022	0.557065	0.125	567.654	54.3734
RMPR-60 (villa magna)	Early Medieval	820 - 990 calCE	-1095	30.2345	0.735833	1618.76	729.103	1021.17	153.373	25.3117	2.63167	123.715	546.612	0.798333	1.6	35.07	109.119	2.07333	0.330833	1.2175	425.933	1.18333	0.0533333	0.789167	0.116667	419.267	64.7147
RMPR-63 (villa magna)	Central Medieval A	970 - 1010 calCE	-1010	28.8257	0.489458	1835.75	745.897	105.467	140.141	40.1574	1.11822	41.7282	213.393	0.365964	1.57154	14.8539	94.4669	1.31175	0.351657	0.15512	455.972	2.72892	0.00677711	0.348645	0.00527108	160.579	4.10115
RMPR-1285 (palazzo della cancelleria)	Medieval	974 - 1035 calCE	-995.5	26.9277	0.835929	2531.58	786.444	258.434	60.8587	10.5056	2.45106	7.89655	73.762	0.0912125	0.395439	6.59622	119.801	3.97998	0.273637	0.254727	470.679	0.305339	0.0600667	0.0333704	0.0444939	72.3237	8.94587
RMPR-58 (villa magna)	Medieval (General)	700 - 1500 CE	-900	29.611	0.28913	1794.21	724.323	401.223	108.798	32.7359	2.71087	15.5576	175.927	0.402174	0.838043	33.3011	93.0054	1.69239	0.343478	0.415217	391.555	2.51196	0.051087	0.33913	0.0163043	264.798	8.14891
RMPR-57 (villa magna)	Central Medieval B	1070 - 1150 calCE	-890	31.7111	0.471342	1928.01	777.256	830.194	186.094	45.2187	2.07089	27.7903	474.873	0.659879	1.80995	22.868	77.635	1.96154	0.38914	1.38914	490.814	3.0641	0.0467572	0.350302	0.0558069	292.357	19.1722
RMPR-64 (villa magna)	Central Medieval B	1070 - 1150 calCE	-890	25.019	0.186741	1657.14	579.675	139.428	116.623	17.8467	2.2333	5.46711	72.5187	0.22419	1.02277	17.8745	70.9372	1.52176	0.209514	0.145749	412.011	2.70243	0.00607287	0.341093	0.00759109	145.55	25.6947
RMPR-65 (villa magna)	Central Medieval B	1070 - 1150 calCE	-890	30.1955	0.373472	1772.54	780.683	157.002	161.189	37.5886	1.29034	12.0208	63.0678	0.322127	1.18643	18.8276	72.6491	1.4566	0.195599	0.182763	449.004	2.20232	0.00794621	0.308374	0.0195599	230.329	18.924
RMPR-62 (villa magna)	Central Medieval C	1130 - 1300 calCE	-785	27.7615	0.271676	1884.16	706.827	177.121	89.978	31.4422	0.903468	4.50636	75.2514	0.265896	1.11561	16.3988	74.8855	0.983237	0.299422	0.32659	351.029	2.08092	0.0109827	0.210405	0.00982659	125.901	5.14239
RMPR-1290 (palazzo della cancelleria)	Medieval	1295 - 1400 calCE	-652.5	30.4578	1.34135	1813.43	716.751	498.942	124.873	80.5501	5.04396	127.13	308.995	0.550137	1.46291	103.516	98.0687	24.6738	0.774038	0.95261	683.554	1.64286	0.250687	0.115728	0.631868	86.033	58.4586
RMPR-52 (villa magna)	Late Medieval	1280 - 1430 calCE	-645	24.3107	0.16874	1768.98	554.169	206.173	78.5358	16.161	2.40124	8.86703	113.975	0.279938	0.753499	22.3429	73.6205	1.71151	0.236392	0.218507	293.054	2.81104	0.0303266	0.187792	0.0147745	241.02	7.91032
RMPR-53 (villa magna)	Late Medieval	1280 - 1430 calCE	-645	20.9575	0.347368	1316.18	435.819	365.832	59.1707	15.0421	1.21353	41.3474	192.238	0.154135	0.545113	14.7714	73.8128	1.61128	0.235338	0.447368	207.844	0.973684	0.0353383	0.150752	0.0421053	146.676	19.5464
RMPR-54 (villa magna)	Late Medieval	1280 - 1430 calCE	-645	25.2519	0.180754	1793.42	670.391	109.33	74.9025	12.619	1.07412	7.28153	33.1099	0.192458	0.635241	16.686	83.2737	1.36801	0.211313	0.124837	259.211	2.03186	0.0377113	0.0985046	0.00845254	110.947	6.80537
RMPR-55 (villa magna)	Late Medieval	1280 - 1430 calCE	-645	25.697	0.174475	1919.86	780.937	63.8603	65.1696	18.8805	1.29483	0.82391	17.9459	0.0799677	0.805331	7.25121	92.668	2.47496	0.339257	0.0718901	284.62	1.48384	0.206785	0.0698708	0.0306947	192.49	1.3503
RMPR-61 (villa magna)	Late Medieval	1280 - 1430 calCE	-645	26.6435	0.151106	2385.19	1006.57	231.787	97.3434	30.9595	1.40111	6.54484	82.9158	0.272727	0.963759	24.5848	77.5934	1.16339	0.211916	0.237101	555.416	1.00061	0.0264128	0.272727	0.0116708	234.491	6.75123
RMPR-56 (villa magna)	Late Medieval	1280 - 1430 calCE	-645	31.9159	0.322508	1997.94	791.73	599.968	115.544	25.7409	3.03625	19.6986	306.998	0.370091	0.811934	37.3844	101.424	1.86934	0.231118	0.637462	444.588	1.42145	0.0196375	0.487915	0.0581571	328.361	17.6025
RMPR-1286 (palazzo della cancelleria)	Medieval	1411 - 1447 calCE	-571	25.0899	1.01071	2351.49	771.241	453.115	81.2405	9.39127	2.07496	44.8097	348.59	0.197694	0.967051	9.14003	137.912	1.63509	0.289951	0.583196	510.979	1.42257	0.0675453	0.0560132	0.121087	70.8558	24.9108
RMPR-1287 (palazzo della cancelleria)	Medieval	1411 - 1447 calCE	-571	27.8005	1.00066	3106.06	753.347	145.56	50.0618	9.53984	10.2211	9.62948	81.8367	0.224436	0.750996	7.04449	79.2649	6.25432	0.466799	0.128154	357.849	0.205179	0.645418	0.0195883	0.0478088	83.3506	24.8718
RMPR-1288 (palazzo della cancelleria)	Medieval	1411 - 1447 calCE	-571	31.6269	1.5123	3019.18	1066.58	765.528	131.503	16.5414	2.75503	33.2405	642.264	0.280761	2.08613	19.5548	169.181	4.22371	0.734899	1.47092	609.487	1.75391	0.50783	0.235459	0.602908	71.5134	54.3699
RMPR-1289 (palazzo della cancelleria)	Medieval	1411 - 1447 calCE	-571	23.6834	1.10199	1765.14	656.975	623.475	93.6828	11.477	12.9925	33.0112	332.047	0.210821	4.48632	8.93843	86.0019	2.24005	0.310323	0.863184	489.905	2.83458	0.0833333	0.107898	0.117537	56.699	47.6078
RMPR-1219 (palazzo della cancelleria)	Renaissance	1417 - 1463 calCE	-560	27.9658	1.18467	2275.92	1017.02	770.31	122.442	14.218	0.921482	18.1451	392.269	0.193467	1.00879	11.8285	132.675	2.61872	0.342337	1.99623	329.147	1.26445	0.155779	0.0383166	0.973618	41.7839	50.2517
RMPR-1220 (palazzo della cancelleria)	Renaissance	1480-1490 CE	-515	28.2879	0.826087	2392.88	820.687	283.039	89.897	13.0293	3.34783	10.8941	220.612	0.172968	0.774102	7.57467	92.5747	4.17864	0.34121	0.595463	540.048	1.05388	0.104915	0.0373346	0.10586	80.3904	76.144
RMPR-1221 (palazzo della cancelleria)	Renaissance	1480-1490 CE	-515	28.5341	1.05054	2621.18	750.066	651.801	63.7214	19.4134	1.90614	88.3995	147.776	0.452467	0.805054	37.8568	121.159	8.45728	0.259928	0.303851	575.128	1.94645	0.681107	0.148616	0.106498	81.2744	44.9444
RMPR-1224 (palazzo della cancelleria)	Renaissance	1480-1490 CE	-515	27.4803	0.999154	3076.6	676.292	256.353	64.9992	13.2496	2.53976	22.2352	127.918	0.211506	1.34095	15.253	135.014	17.9154	0.705584	0.287648	394.75	0.448393	0.219966	0.0642978	0.132826	70.3748	38.5477
RMPR-969 (tivoli palazzo cianti)	Renaissance	1600-1700 CE	-350	28.2796	0.513908	2913.67	684.508	351.522	83.8651	3.52573	0.51669	11.6745	249.741	0.207928	0.796245	6.19819	80.9437	1.25035	0.172462	0.19541	392.447	2.0299	0.0938804	0.101182	0.0375522	33.9798	20.2884
RMPR-970 (tivoli palazzo cianti)	Renaissance	1600-1700 CE	-350	29.4609	0.513128	2898.17	761.223	80.2945	62.1615	9.67466	0.247146	16.5303	36.2106	0.123288	0.417237	7.95148	111.242	1.371	0.164384	0.0821918	361.844	1.71518	0.711758	0.150685	0.0251142	23.6701	12.3478
RMPR-973 (tivoli palazzo cianti)	Renaissance	1600-1700 CE	-350	24.1604	0.34145	2412.52	700.019	144.147	77.6981	8.26353	3.17316	6.61364	59.7646	0.107684	1.91991	4.51569	107.343	3.77543	0.192641	0.129329	308.61	1.19697	0.0746753	0.0808983	0.0151515	45.7435	5.55736
* (Direct radiocarbon date on the individual calibrated 95% confidence interval or date range based on the archaeological context, including AMS dating of stratigraphic unit)
